# Supplementary material
Source: publisher figshare collection journal article supplement (https://geolsoc.figshare.com/articles/dataset/_/3453455)

# Experiment 13

Brittle/plastic multilayer involving a décollement

Erosion is performed each 2 cm of shortening (indicated on the digital screen)

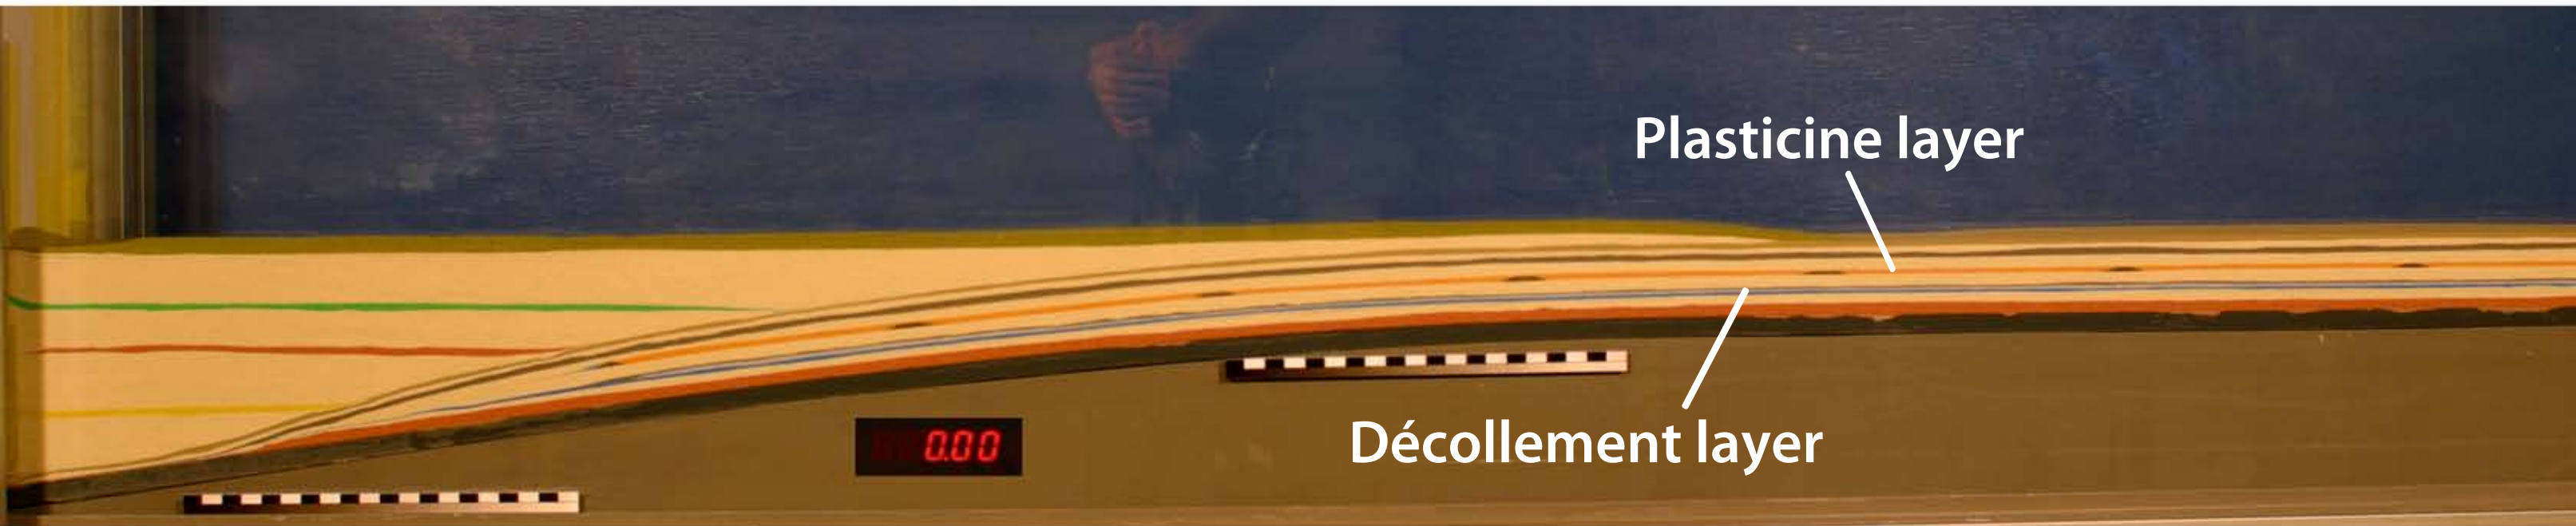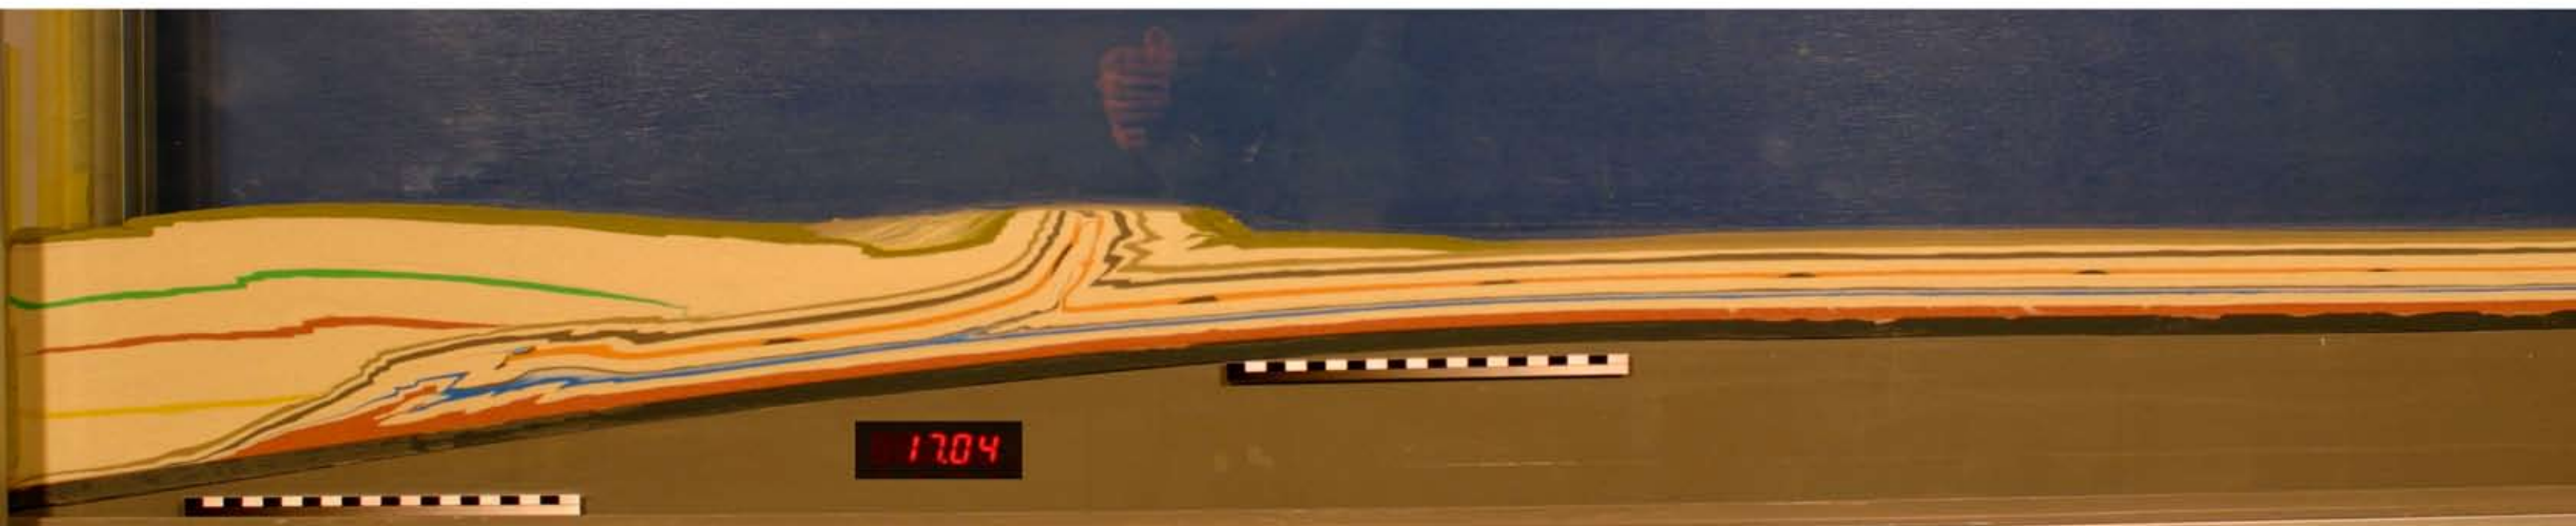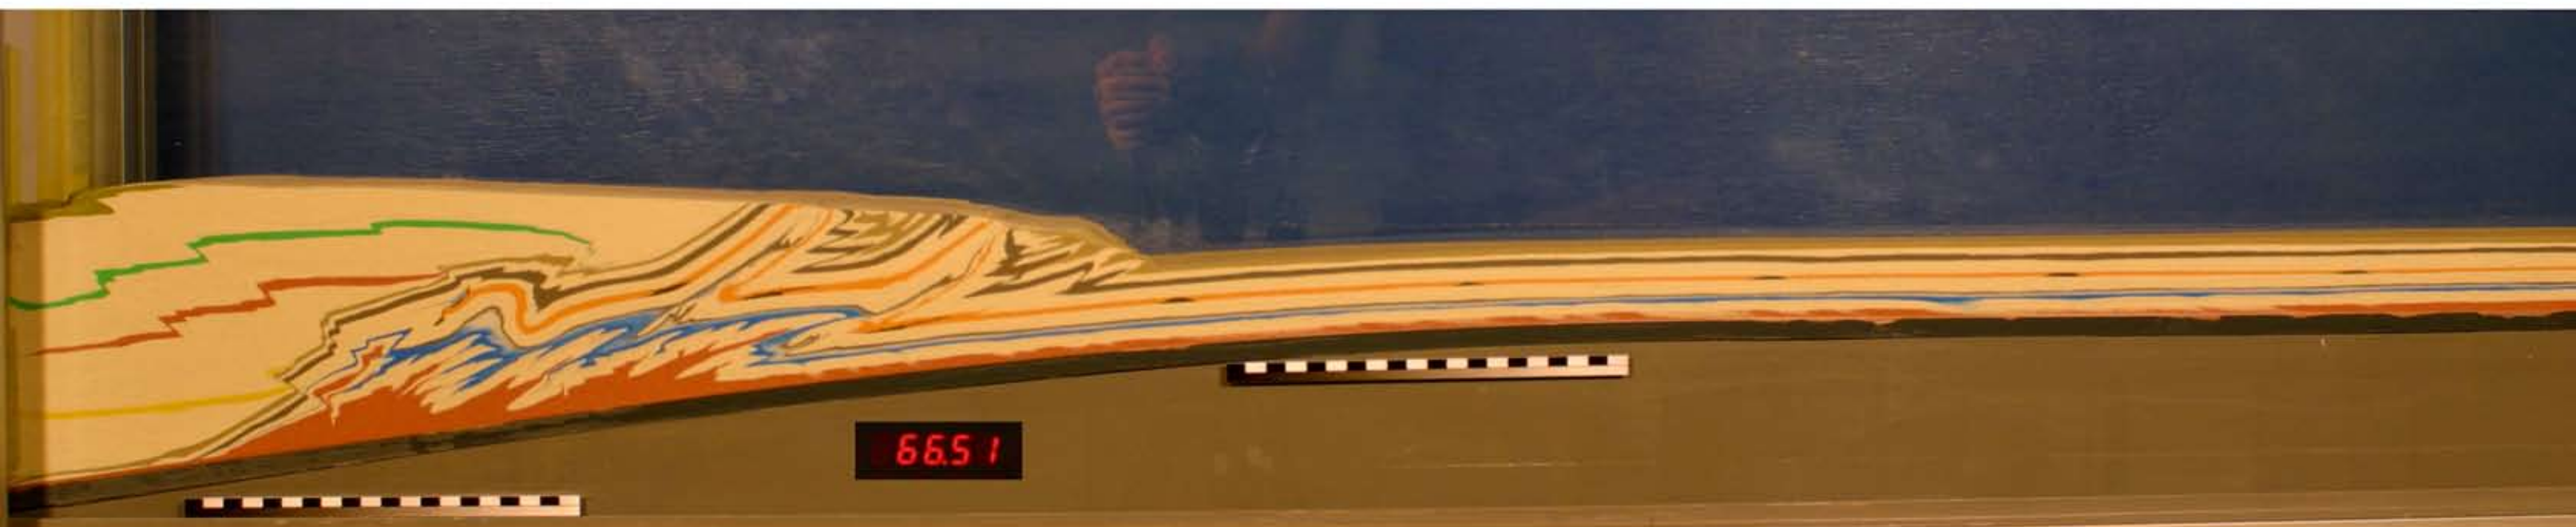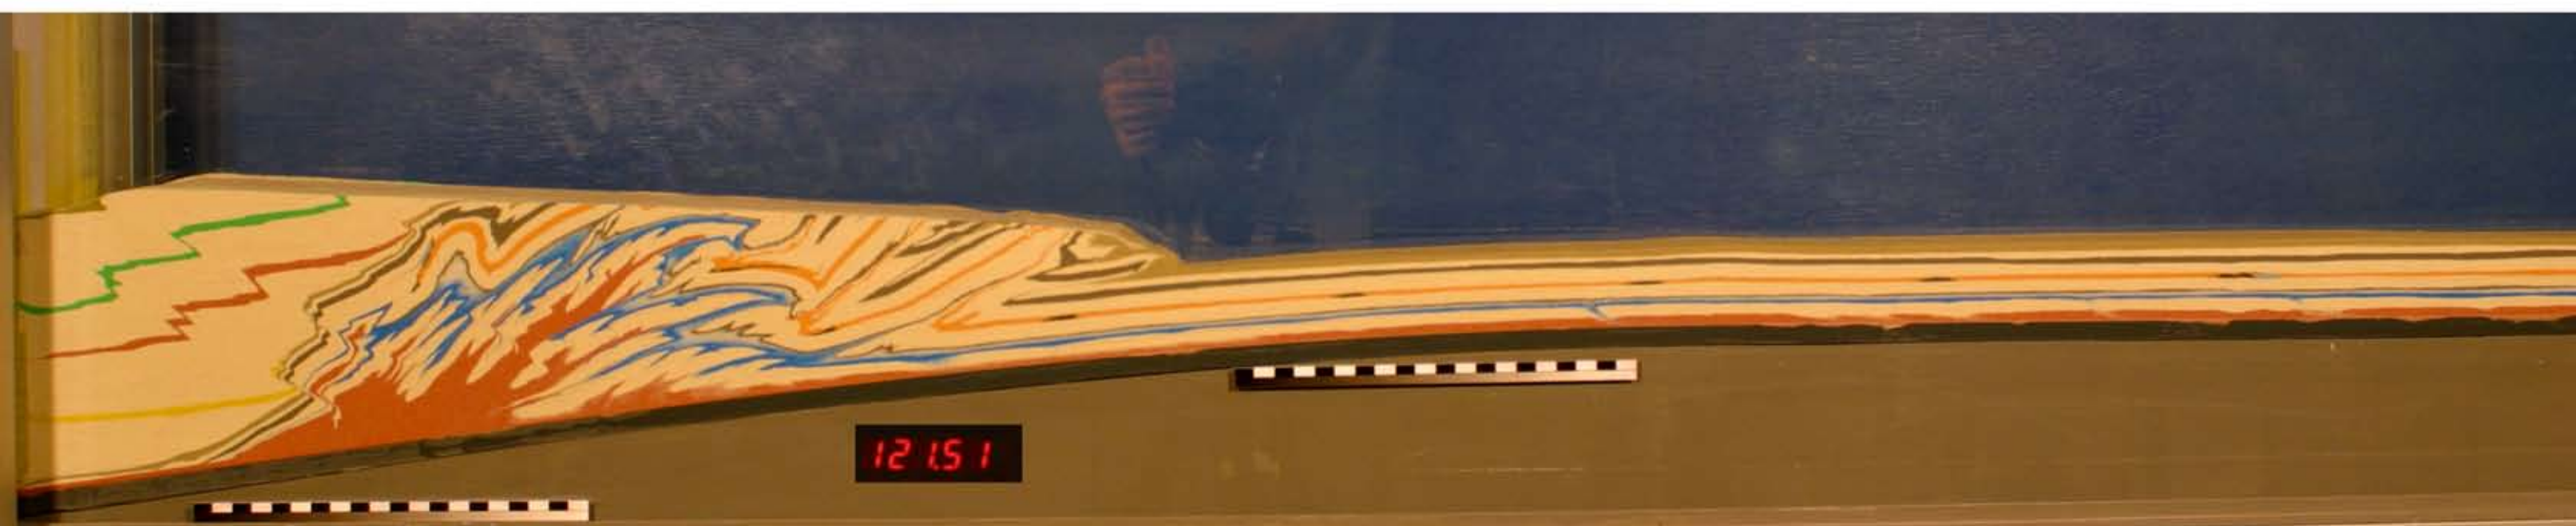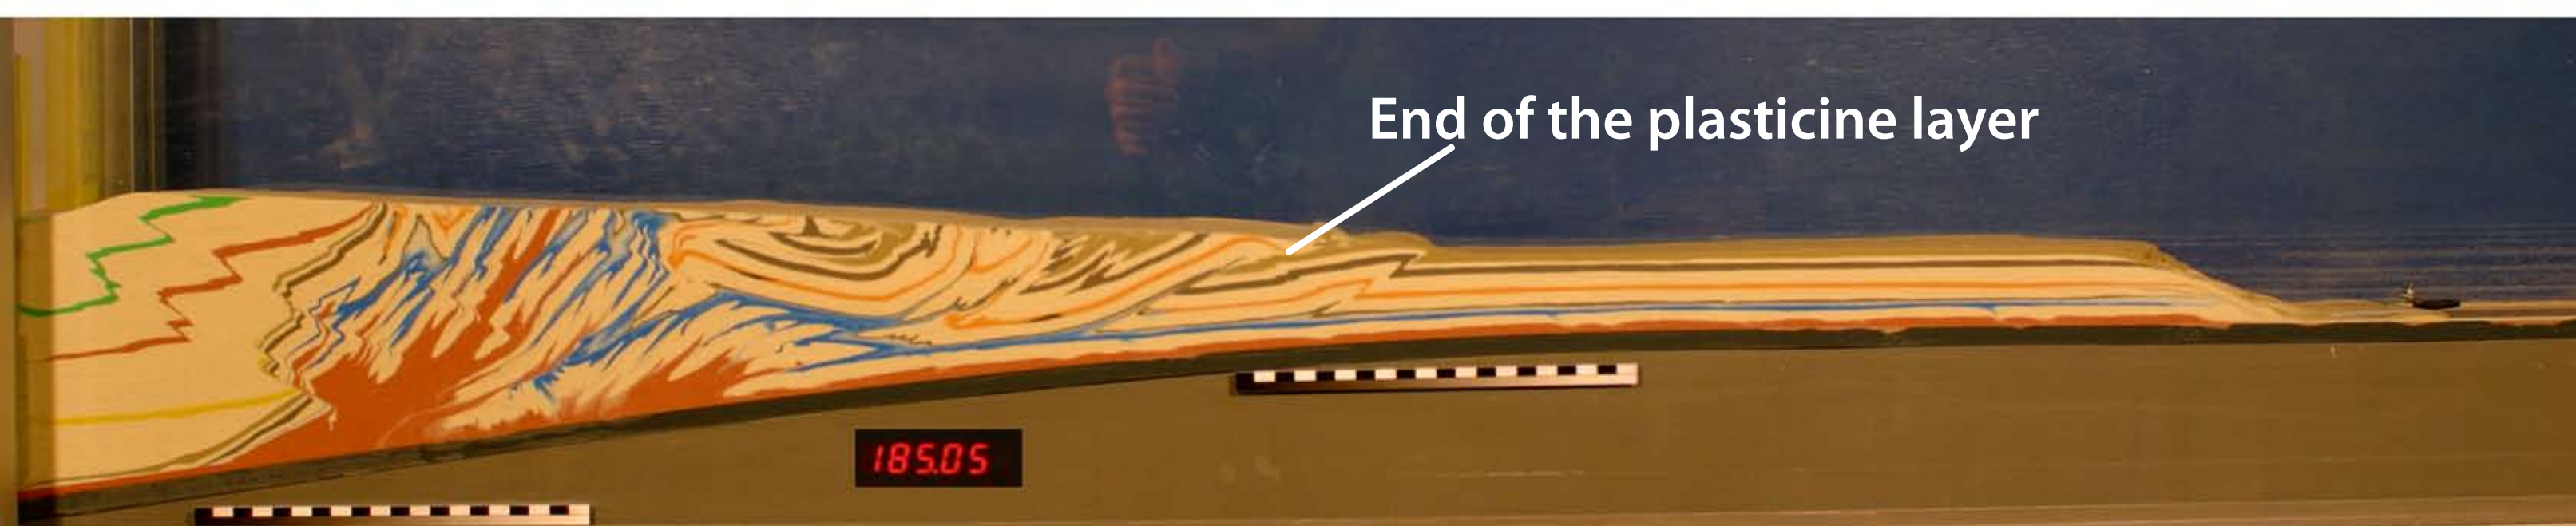

Supplement: Supplementary file 2 [file 1]
